# Supplementary material
Source: publisher site journal article supplement (https://www.spandidos-publications.com/7619/downloadSupplementary)
Supplement: Supplementary file 1 [file downloadSupplementary]

**Table SI.** Primers sequences used in the present study.

| <b>Primer</b> | <b>Direction</b> | <b>Sequence (5'-3')</b>  |
|---------------|------------------|--------------------------|
| circEFR3A     | Forward          | AGACCAGTTTTTGCGCATT      |
|               | Reverse          | GGCCATCTTTTGGATCTTCA     |
| EFR3A         | Forward          | ATCCAAAAGATGGCCTTGTG     |
|               | Reverse          | CAACATCCCTGCTCAACCTT     |
| GAPDH         | Forward          | CGCTGAGTACGTCGTGGAGTC    |
|               | Reverse          | GCTGATGATCTTGAGGCTGTTGTC |
| U6            | Forward          | CTCGCTTCGGCAGCACA        |
|               | Reverse          | AACGCTTCACGAATTTGCGT     |
| miR-590-3p    | Forward          | TGAGCTTATTCATAAAAGTGC    |
|               | Reverse          | TGCTGCATGTTTCAATCAGA     |

Circ, circular RNA; miR, microRNA.
